# Supplementary material
Source: PubMed Central journal article supplement (PMC8246917)
Supplement: ALZ-17-574-s002.pdf [file ALZ-17-574-s002.pdf]

|                                   | <b>Overall</b> | <b>Controls</b> | <b>MCI</b> | <b>AD-Dementia</b> | <b>bvFTD</b> |
|-----------------------------------|----------------|-----------------|------------|--------------------|--------------|
| <b>UDS3-EF</b>                    | 305            | 96              | 84         | 87                 | 38           |
| <b>EXAMINER</b>                   | 265            | 96              | 79         | 86                 | 4            |
| <b>Modified Trails</b>            | 248            | 89              | 71         | 58                 | 30           |
| <b>Design Fluency</b>             | 277            | 93              | 73         | 77                 | 34           |
| <b>Letter Fluency (D-Words)</b>   | 276            | 93              | 72         | 78                 | 33           |
| <b>15-Item Boston Naming Test</b> | 275            | 92              | 72         | 77                 | 34           |
| <b>VOSP Number Location</b>       | 271            | 93              | 71         | 73                 | 34           |
| <b>Craft Story (%Retention)</b>   | 234            | 90              | 65         | 50                 | 29           |
| <b>Benson Figure (%Retention)</b> | 280            | 93              | 74         | 78                 | 35           |

**Supplemental Table A. Sample size per test per study group**

**Abbrev:** AD – Alzheimer’s disease, bvFTD – behavioral variant frontotemporal dementia, EXAMINER – Executive Abilities: Measurement and Instruments for Neurobehavioral Evaluation and Research, UDS3-EF – Uniform Data Set v3.0 Executive Function composite score, VOSP – Visual Object Spatial Perception

|                                           | Overall             | Controls            | MCI                  | AD-Dementia          | bvFTD                 |
|-------------------------------------------|---------------------|---------------------|----------------------|----------------------|-----------------------|
| <b>UDS3-EF<sup>a</sup></b>                | -1.29 (1.58)        | 0.08 (0.90)         | -0.92 (0.99)         | -2.54 (1.32)         | -2.72 (1.16)          |
| <b>NIH EXAMINER Composite<sup>b</sup></b> | 0.22 (1.03)         | 0.97 (0.58)         | 0.34 (0.82)          | -0.68 (0.86)         | -0.90 (0.70)          |
| <b>Modified Trails</b>                    | -0.49 (1.29)        | 0.40 (1.01)         | -0.62 (-1.40, 0.07)  | -1.88 (-2.37, -0.94) | -0.92 (1.08)          |
| <b>Design Fluency</b>                     | -0.57 (1.30)        | 0.34 (0.93)         | -0.32 (1.11)         | -1.56 (0.96)         | -1.40 (1.20)          |
| <b>Letter Fluency (D-Words)</b>           | -0.73 (1.27)        | -0.07 (1.13)        | -0.49 (0.99)         | -1.49 (-2.16, -0.61) | -1.71 (1.06)          |
| <b>VOSP Number Location</b>               | -0.04 (-0.79, 0.71) | 0.71 (-0.04, 0.71)  | -0.04 (-0.04, 0.71)  | -0.79 (-2.29, -0.04) | -0.04 (-0.79, 0.71)   |
| <b>15-Item Boston Naming</b>              | -0.26 (-1.22, 0.70) | 0.70 (-0.26, 0.70)  | -0.26 (-1.22, 0.70)  | -1.22 (-3.13, 0.22)  | -3.61 (-10.80, -0.26) |
| <b>Craft Story (%Retention)</b>           | -0.73 (-2.46, 0.31) | -0.07 (-0.47, 0.55) | -1.02 (-2.13, -0.10) | -4.58 (-5.20, -1.53) | -2.72 (2.32)          |
| <b>Benson Figure (%Retention)</b>         | -1.07 (1.84)        | 0.46 (0.85)         | -1.12 (1.55)         | -2.95 (-4.00, -1.64) | -1.63 (2.09)          |
| <b>Grey Matter Volumes (N)</b>            | 210                 | 75                  | 48                   | 55                   | 39                    |
| <b>Frontal Lobe</b>                       | -0.28 (1.25)        | 0.33 (1.00)         | -0.03 (1.06)         | -0.63 (0.86)         | -1.34 (1.53)          |
| <b>Parietal Lobe</b>                      | -0.31 (1.13)        | 0.28 (1.00)         | -0.14 (0.98)         | -0.93 (0.90)         | -0.87 (1.17)          |
| <b>Temporal Lobe</b>                      | -0.56 (1.28)        | 0.25 (1.01)         | -0.22 (0.91)         | -0.98 (0.84)         | -2.03 (1.17)          |
| <b>Occipital Lobe</b>                     | -0.13 (1.04)        | 0.26 (1.07)         | -0.11 (1.07)         | -0.42 (0.82)         | -0.56 (0.97)          |
| <b>DLPFC</b>                              | -0.29 (1.24)        | 0.30 (1.03)         | -0.09 (1.04)         | -0.73 (0.96)         | -1.13 (1.52)          |
| <b>ACC</b>                                | -0.27 (1.23)        | 0.34 (0.98)         | -0.12 (0.99)         | -0.36 (0.93)         | -1.58 (1.33)          |
| <b>OFC</b>                                | -0.36 (1.38)        | 0.32 (0.99)         | 0.00 (1.04)          | -0.60 (0.91)         | -1.85 (1.75)          |
| <b>Pericalcarine Cortex</b>               | -0.09 (1.02)        | 0.19 (1.06)         | -0.02 (1.05)         | -0.21 (0.81)         | -0.55 (0.99)          |

<sup>a</sup>Z-scores based on NACC dataset development sample; <sup>b</sup>Z-scores based on test manual normative sample distribution

**Supplemental Table B:** Standardized (z-score) values for each cognitive and structural MRI outcome stratified by functional diagnostic group. Unless otherwise noted, z-scores (unadjusted) are based on means and standard deviations of an independent sample of clinically normal older adults from the UCSF Hillblom Aging Network. The size of the reference sample differed slightly by test but was approximately N=250-700, 66±13 years old, 17±2 years of education, 80% white/Caucasian, and 60% female. The reference sample for structural MRI volumes was scanner-specific: Siemens 3T Trio (N=410, mdn [IQR] age=67 [62-74], 56% female), Siemens 3T Prisma Fit (N=299, mdn [IQR] age=66 [59-76], 52% female). Data are presented as mean (standard deviation) or median (lower IQR, upper IQR) depending on whether there was evidence for approximate normality of the z-score distribution.

**Abbrev:** ACC – anterior cingulate cortex, AD – Alzheimer’s disease, bvFTD – behavioral variant frontotemporal dementia, DLPFC – dorsolateral prefrontal cortex, OFC – orbitofrontal cortex, UDS3-EF – Uniform Data Set v3.0 Executive Function composite score
