# Supplementary material
Source: PubMed Central journal article supplement (PMC8246917)
Supplement: ALZ-17-574-s003.pdf [file ALZ-17-574-s003.pdf]

**A**

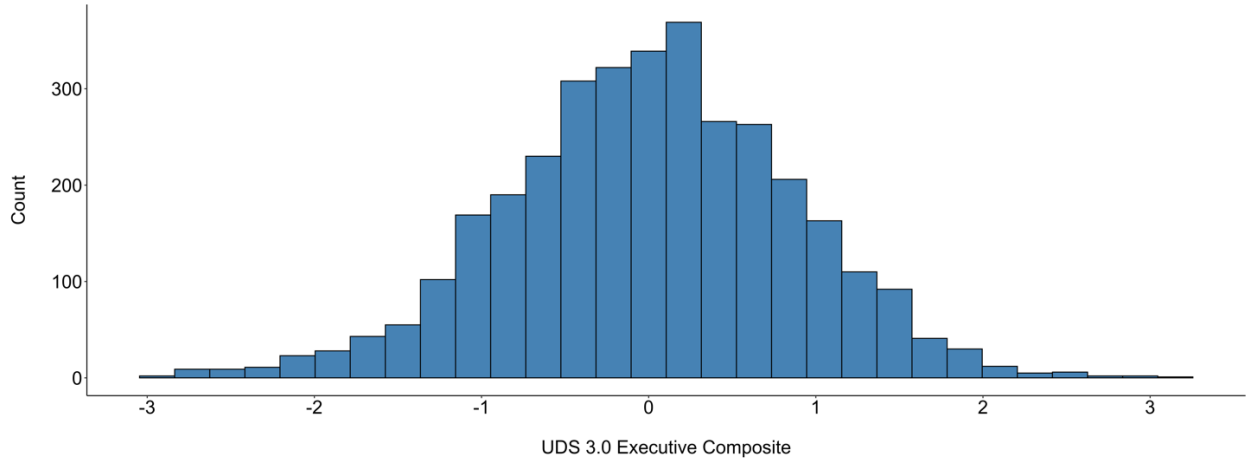

**B**

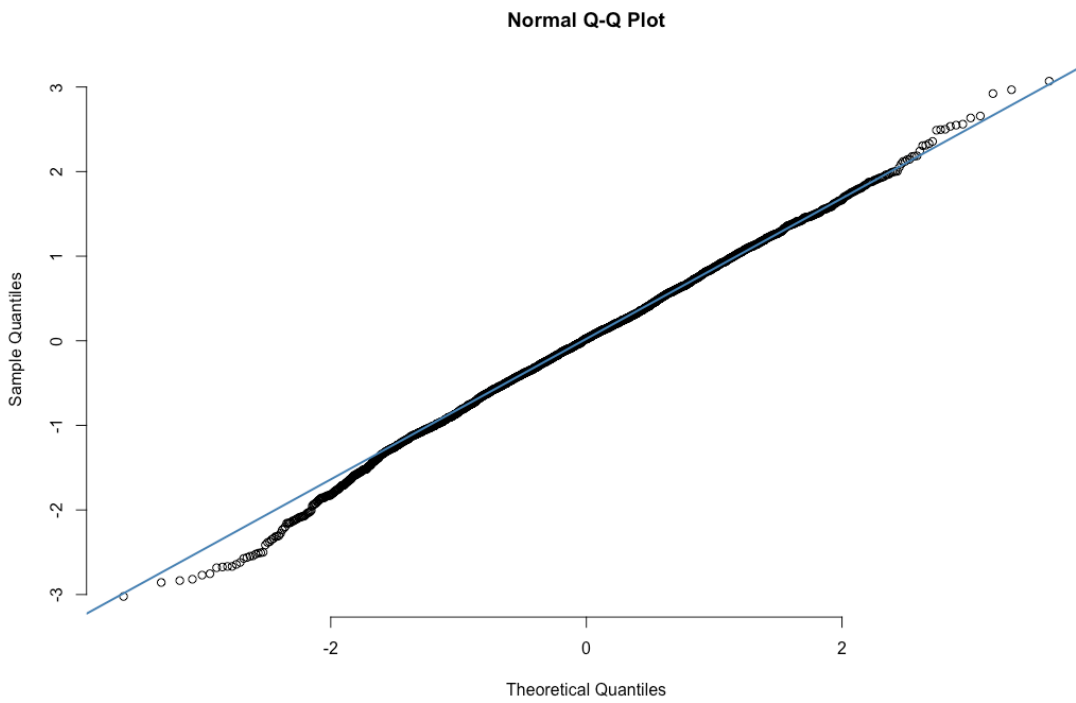

**Supplemental Figure (A-B):** Histogram (A) and Q-Q plot (B) demonstrating no clear evidence of departure from normality for UDS3-EF scores in the NACC development cohort

## UDS3 Executive Composite Score vs. Age (Yrs) @ 16 Yrs educ

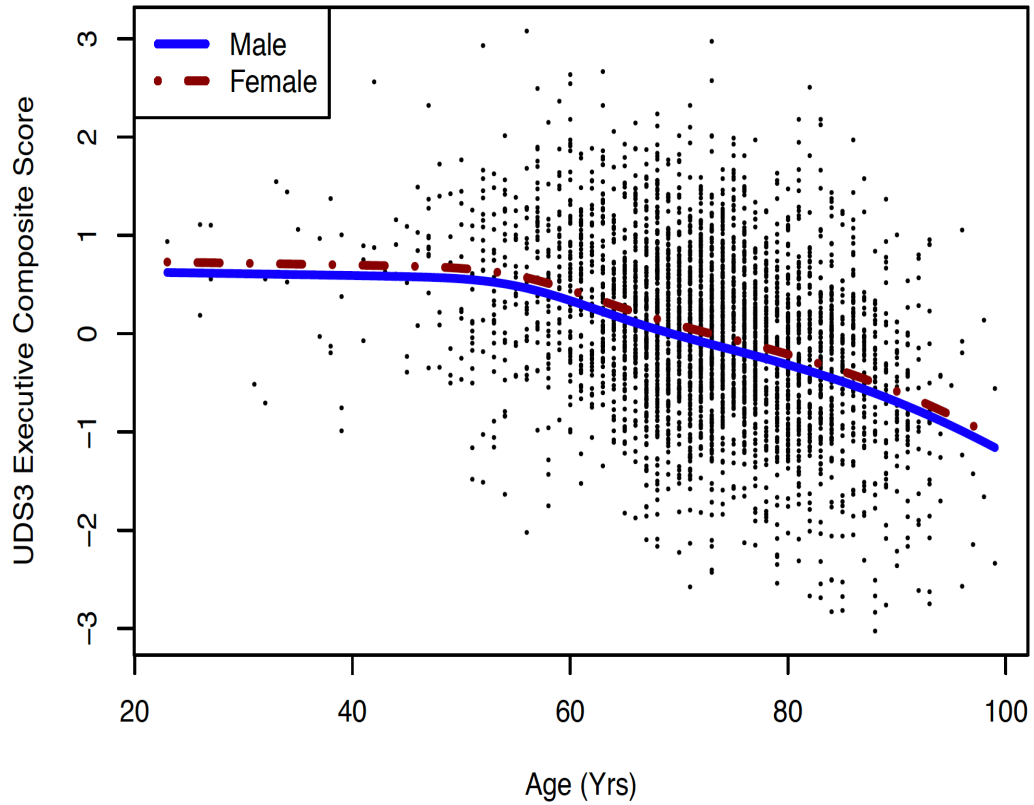

**Supplemental Figure C: Minimal additive effect of sex shown for controls with 16 years of education across the age spectrum.**
